# Supplementary material for: Image-level and group-level models for Drosophilagene expression pattern annotation
Source: Springer Nature journal article supplement (doi:10.1186/1471-2105-14-350), 2013-12-01
Supplement: 12859_2013_6221_MOESM1_ESM.pdf [file 12859_2013_6221_MOESM1_ESM.pdf]

## Group-level training set

| Sample                                                                           | Labels                                                 |
|----------------------------------------------------------------------------------|--------------------------------------------------------|
| 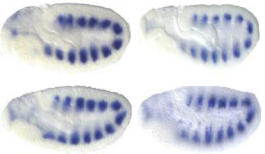 | Fat body/gonad primordium<br>Somatic muscle primordium |

## Image-level training set

| Sample                                                                               | Labels                                                 |
|--------------------------------------------------------------------------------------|--------------------------------------------------------|
|   | Fat body/gonad primordium<br>Somatic muscle primordium |
|   | Fat body/gonad primordium<br>Somatic muscle primordium |
|   | Fat body/gonad primordium<br>Somatic muscle primordium |
|  | Fat body/gonad primordium<br>Somatic muscle primordium |
