# Supplementary material for: Image-level and group-level models for Drosophilagene expression pattern annotation
Source: Springer Nature journal article supplement (doi:10.1186/1471-2105-14-350), 2013-12-01
Supplement: 12859_2013_6221_MOESM2_ESM.pdf [file 12859_2013_6221_MOESM2_ESM.pdf]

| scheme      | Test images                                                                        | Predicted keywords                                                                                                                  | Final results                                                                                                                       |
|-------------|------------------------------------------------------------------------------------|-------------------------------------------------------------------------------------------------------------------------------------|-------------------------------------------------------------------------------------------------------------------------------------|
| Group-level | 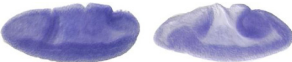 | 'anterior endoderm anlage'<br>'head mesoderm primordium P4'<br>'posterior endoderm primordium P2'<br>'trunk mesoderm primordium P2' | 'anterior endoderm anlage'<br>'head mesoderm primordium P4'<br>'posterior endoderm primordium P2'<br>'trunk mesoderm primordium P2' |
| Image-level |  | 'anterior endoderm anlage'<br>'posterior endoderm primordium P2'<br>'trunk mesoderm primordium P2'                                  | 'anterior endoderm anlage'<br>'head mesoderm primordium P4'                                                                         |
|             |  | 'trunk mesoderm primordium P2'<br>'head mesoderm primordium P4'<br>'anterior endoderm anlage'<br>'posterior endoderm primordium P2' | 'posterior endoderm primordium P2'<br>'trunk mesoderm primordium P2'                                                                |
