# Supplementary material for: Image-level and group-level models for Drosophilagene expression pattern annotation
Source: Springer Nature journal article supplement (doi:10.1186/1471-2105-14-350), 2013-12-01

### Stage 4-6

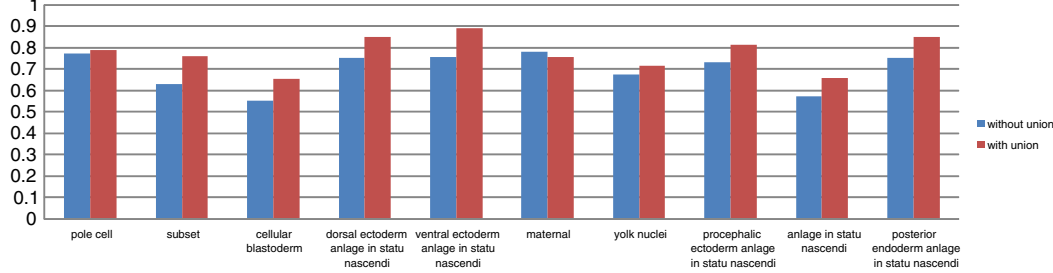

### Stage 7-8

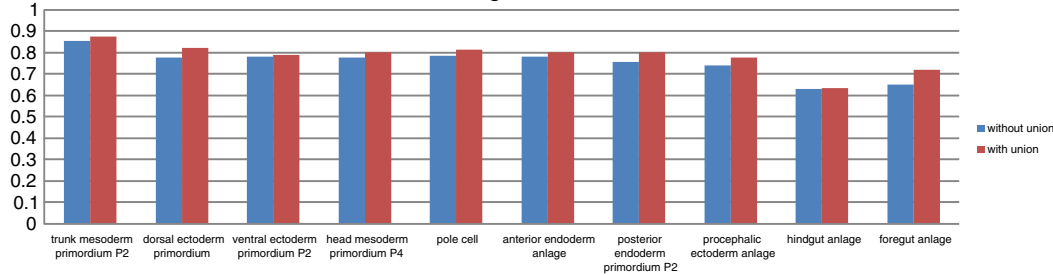

### Stage 9-10

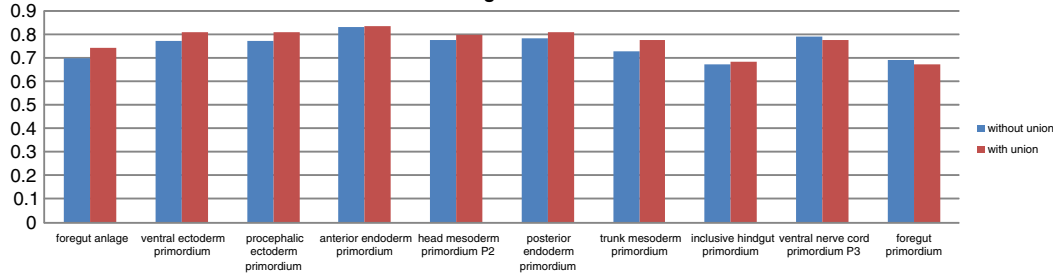

### Stage 11-12

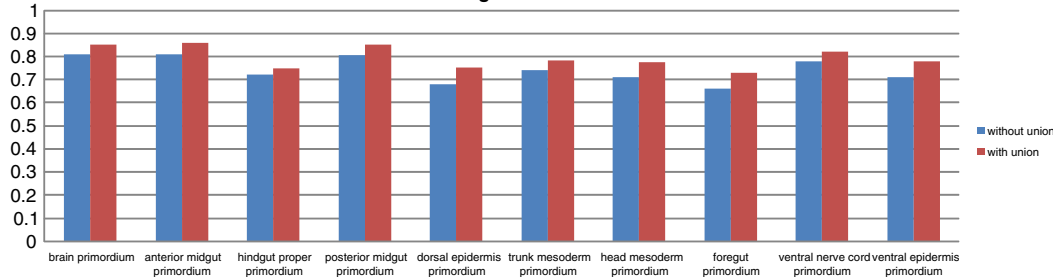

### Stage 13-17

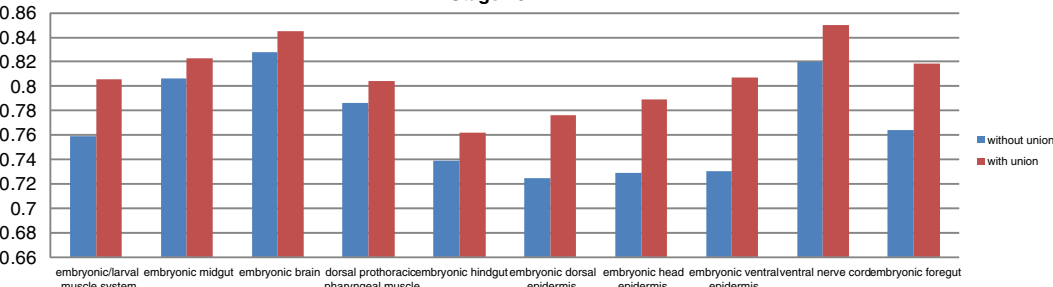

Supplement: 12859_2013_6221_MOESM5_ESM.pdf [file 12859_2013_6221_MOESM5_ESM.pdf]
