# Supplementary material for: Image-level and group-level models for Drosophilagene expression pattern annotation
Source: Springer Nature journal article supplement (doi:10.1186/1471-2105-14-350), 2013-12-01

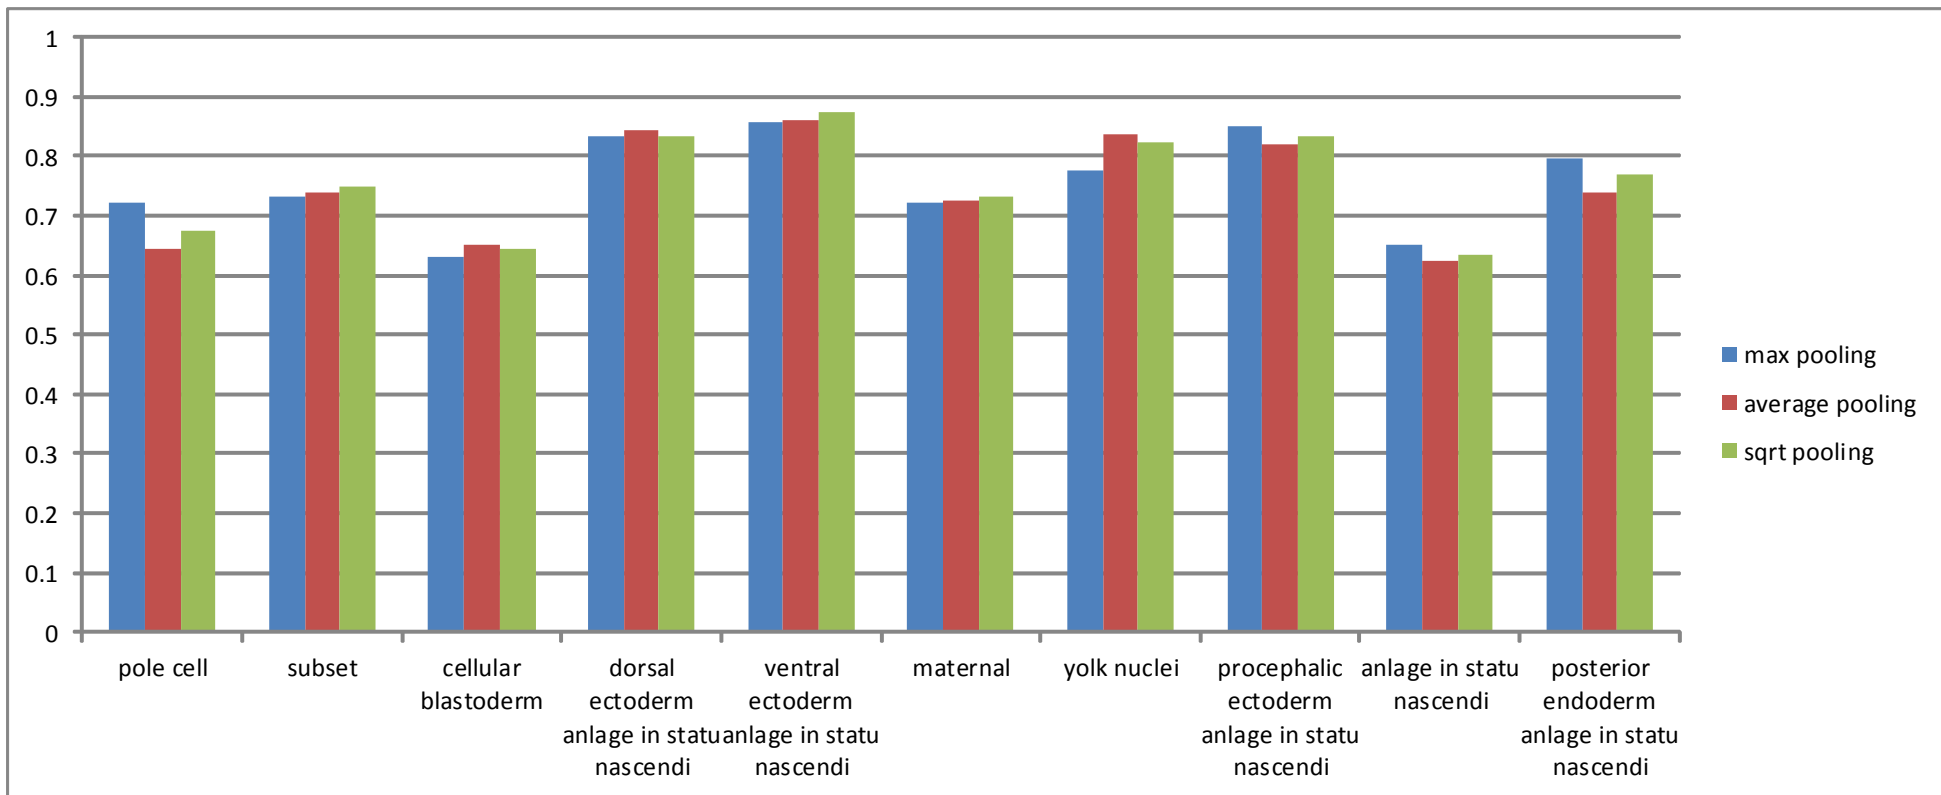

Supplement: 12859_2013_6221_MOESM9_ESM.pdf [file 12859_2013_6221_MOESM9_ESM.pdf]
